# Supplementary material for: Triblock terpolymer helices self-assembled under special solvation conditions
Source: Royal Society of Chemistry journal article supplement (doi:10.1039/c0sm00283f), 2010-01-01
Supplement: c0sm00283f.pdf [file c0sm00283f.pdf]

## Supporting Information for Triblock Terpolymer Helices Self-assembled under Special Solvation Conditions

Hongjing Dou,<sup>1,2</sup> Guojun Liu,<sup>1\*</sup> John Dupont, and Liangzhi Hong<sup>1</sup>

<sup>1</sup>Department of Chemistry, Queen's University, 90 Bader Lane, Kingston, Ontario, Canada

K7L 3N6. <sup>2</sup>On leave from the State Key Lab of Metal Matrix Composites, and School of

Materials Science and Engineering, Shanghai Jiao Tong University, Shanghai 200240, China

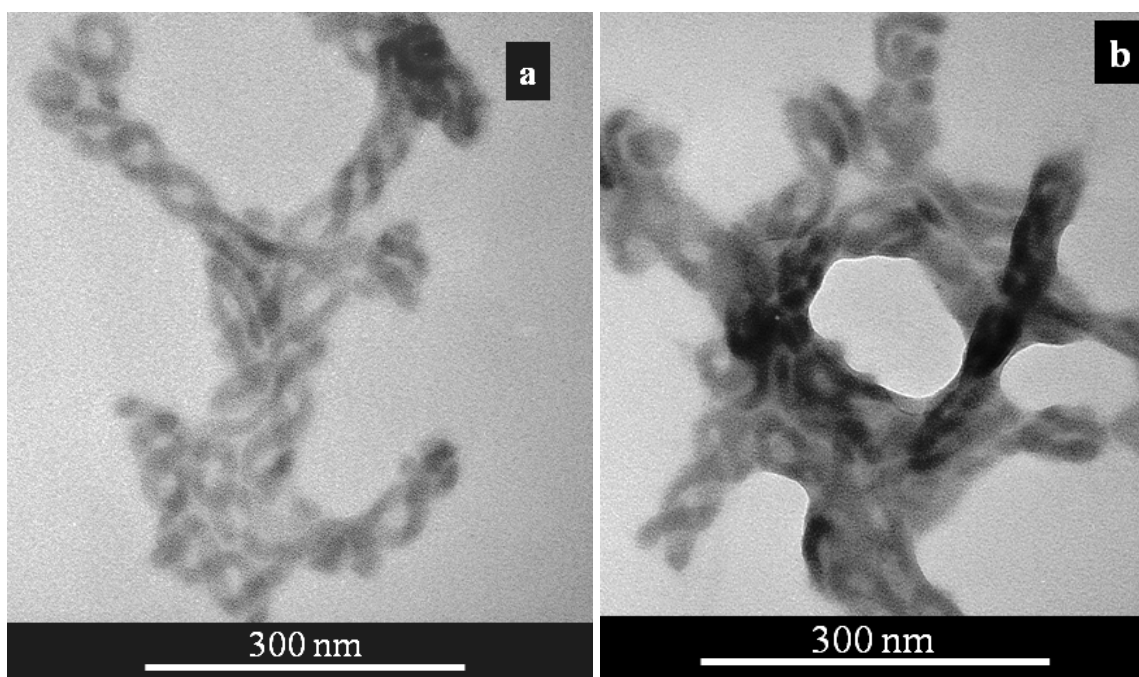

**Figure 1S.** TEM images of B<sub>350</sub>C<sub>160</sub>T<sub>160</sub> aggregates sprayed from CHCl<sub>3</sub>/EOH and THF/EOH at  $f_{\text{EOH}} = 99.5\%$  58 d (b) after solution preparation. The samples were stained by OsO<sub>4</sub>.

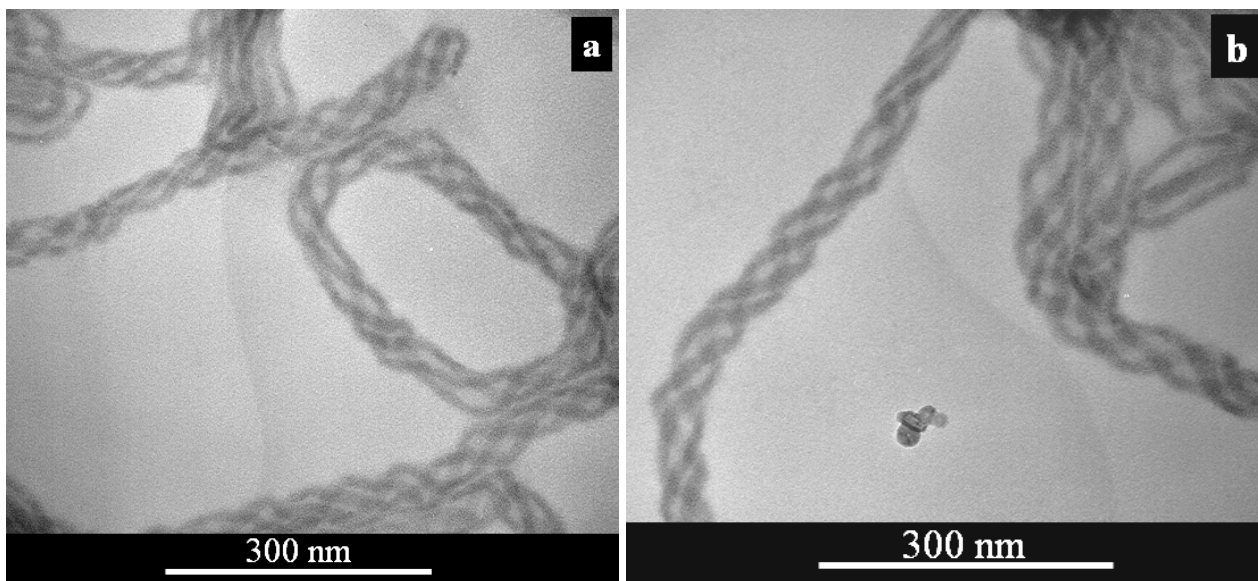

**Figure 2S.** TEM image of  $B_{240}(C_{0.75}P_{0.25})_{120}T_{120}$  (a) and  $B_{240}(C_{0.65}P_{0.35})_{120}T_{120}$  (b) micelles sprayed from THF/MeOH at  $f_{MeOH}=81\%$  after sample aging for 58 d.

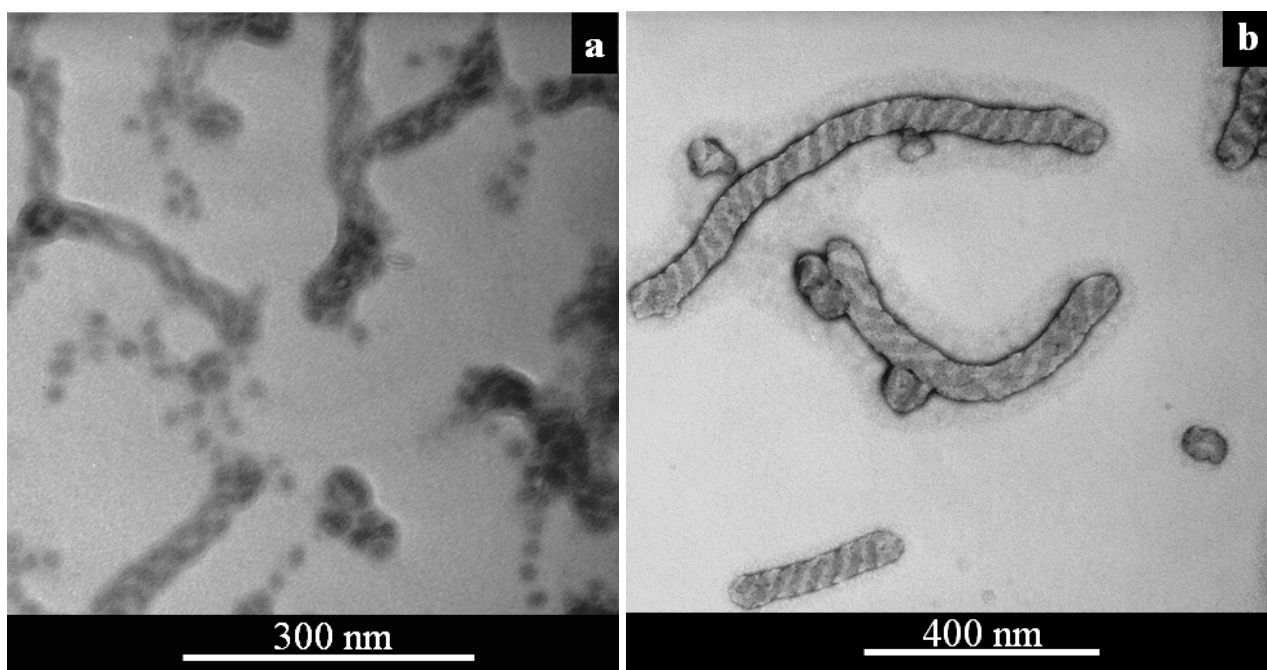

**Figure 3S.** TEM images of  $B_{240}C_{120}(T_{0.75}A_{0.25})_{120}$  (a) and  $B_{360}C_{160}A_{160}$  micelles sprayed from THF/MeOH at  $f_{MOH}=81\%$  2 weeks after sample aging. The first sample was stained by  $OsO_4$  and the second sample was stained by both  $RuO_4$  and  $UO_2(Ac)_2$ .
